# Supplementary material
Source: PubMed Central journal article supplement (PMC1856519)

| Column | Row | Tumor/normal tissue | Corrected intensity IHC HMGB1 tissue array | Average # of FISH signals per cell |
|--------|-----|---------------------|--------------------------------------------|------------------------------------|
| 1      | 1   | colon adenoca       | 3768,32                                    | 2,1                                |
| 1      | 2   | normal tissue       | 225,12                                     | 1,5                                |
| 1      | 3   | colon adenoca       | 4239,8                                     | 2,3                                |
| 1      | 4   | normal tissue       | 41,04                                      | 1,7                                |
| 1      | 5   | colon adenoca       | 4907,75                                    | 1,9                                |
| 1      | 6   | normal tissue       | 1306,11                                    | 1,7                                |
| 1      | 7   | colon adenoca       | 4223,13                                    | 1,8                                |
| 1      | 8   | normal tissue       | 401,28                                     | 1,7                                |
| 1      | 9   | colon adenoca       | 6278,48                                    | 2                                  |
| 1      | 10  | normal tissue       | n.d.                                       | 1,8                                |
| 2      | 1   | colon adenoca       | 3163,24                                    | 2                                  |
| 2      | 2   | normal tissue       | n.d.                                       | 1,7                                |
| 2      | 3   | colon adenoca       | 258                                        | 3                                  |
| 2      | 4   | normal tissue       | n.d.                                       | 2                                  |
| 2      | 5   | colon adenoca       | 9521,6                                     | 2,8                                |
| 2      | 6   | normal tissue       | 37,62                                      | 1,9                                |
| 2      | 7   | colon adenoca       | 3182,4                                     | 3,2                                |
| 2      | 8   | normal tissue       | 232,2                                      | 1,7                                |
| 2      | 9   | colon adenoca       | 894,52                                     | 2,1                                |
| 2      | 10  | normal tissue       | 446,4                                      | 1,8                                |
| 3      | 1   | colon adenoca       | 318,44                                     | 1,7                                |
| 3      | 2   | normal tissue       | n.d.                                       | 1,5                                |
| 3      | 3   | colon adenoca       | 4737,6                                     | 4,4                                |
| 3      | 4   | normal tissue       | 174,08                                     | 1,9                                |
| 3      | 5   | colon adenoca       | 1265,55                                    | 1,9                                |
| 3      | 6   | normal tissue       | 150,66                                     | 1,7                                |
| 3      | 7   | colon adenoca       | 11213,25                                   | n.d.                               |
| 3      | 8   | normal tissue       | 769,08                                     | n.d.                               |
| 3      | 9   | colon adenoca       | 3685,09                                    | 2,7                                |
| 3      | 10  | normal tissue       | n.d.                                       | n.d.                               |
| 4      | 1   | colon adenoca       | 17856,24                                   | 2,2                                |
| 4      | 2   | normal tissue       | 345,36                                     | 1,9                                |
| 4      | 3   | colon adenoca       | 3330,36                                    | 2                                  |
| 4      | 4   | normal tissue       | 1847,68                                    | 1,8                                |
| 4      | 5   | colon adenoca       | 13229,58                                   | 2,3                                |
| 4      | 6   | normal tissue       | 510,34                                     | 2                                  |
| 4      | 7   | colon adenoca       | 5948,12                                    | 2,1                                |
| 4      | 8   | normal tissue       | 142,15                                     | 1,8                                |
| 4      | 9   | colon adenoca       | 5838,1                                     | 1,9                                |
| 4      | 10  | normal tissue       | 378,56                                     | 1,7                                |
| 5      | 1   | colon adenoca       | 18342,58                                   | 1,6                                |
| 5      | 2   | normal tissue       | n.d.                                       | 1,6                                |
| 5      | 3   | colon adenoca       | 13168,8                                    | 1,6                                |
| 5      | 4   | normal tissue       | 3087,83                                    | 1,7                                |
| 5      | 5   | colon adenoca       | 2780,5                                     | 1,8                                |
| 5      | 6   | normal tissue       | 285,3                                      | 1,7                                |
| 5      | 7   | colon adenoca       | 5436,19                                    | 2,2                                |
| 5      | 8   | normal tissue       | 775,32                                     | 1,9                                |
| 5      | 9   | colon adenoca       | 5677,13                                    | 2,4                                |
| 5      | 10  | normal tissue       | n.d.                                       | 1,7                                |
| 6      | 1   | placenta (control)  | -                                          | -                                  |
| 6      | 2   | paraffin (control)  | -                                          | -                                  |

| Column | Row | Tumor/normal tissue | Corrected intensity IHC HMGB1 tissue array | Average # of FISH signals per cell |
|--------|-----|---------------------|--------------------------------------------|------------------------------------|
| 6      | 3   | colon adenoca       | 8687,9                                     | 1,7                                |
| 6      | 4   | normal tissue       | 447                                        | 1,8                                |
| 6      | 5   | Colon Adenoca       | 6139,38                                    | 2,8                                |
| 6      | 6   | normal tissue       | n.d.                                       | 1,8                                |
| 6      | 7   | Colon Adenoca       | 3947,76                                    | 1,9                                |
| 6      | 8   | normal tissue       | 458,7                                      | 1,8                                |
| 6      | 9   | Colon Adenoca       | 14106,3                                    | n.d.                               |
| 6      | 10  | normal tissue       | n.d.                                       | n.d.                               |

**Supplementary Table 1:** FISH and immunohistochemical analysis of HMGB1 on a tissue microarray with 29 colon adenocarcinoma (colon adenoca) and normal tissue from the same patient.

## Figure Supplementary Material

### Figure 1:

Elevated *HMGB1* mRNA levels in tumors of the uterus, colon and stomach. A Cancer Profiling Array from *Clontech* was hybridized with a  $^{32}\text{[P]}$ -labelled *Hmgb1* probe. cDNA synthesized from different tumor RNAs had been spotted pairwise on the array, together with cDNA derived from corresponding normal tissues of the same patients. Hybridization signals were quantified with a *BIO RAD* phosphoimager. The figure represents the ratio between *HMGB1* signal strength in tumor versus normal tissue. Out of 37 colon carcinomas, 14 expressed more than 1.5 as much *HMGB1* mRNA than the corresponding normal tissues (carcinomas of the uterus: 18/40; stomach carcinomas 9/27). Some of the tumors express *HMGB1* mRNA up to five times higher than the corresponding normal tissue.

### Figure 2:

Overexpression of *HMGB1* enhances NF- $\kappa$ B activity in RKO colon carcinoma cells.  $6 \times 10^5$  RKO cells were transiently transfected in triplicate in 12-well plates using polyethylenimine (PEI) with empty vector control or with 0.2  $\mu\text{g}$  of an *Hmgb1* expression construct together with 0.4  $\mu\text{g}$  of the NF- $\kappa$ B-dependent luciferase reporter plasmid *p3 $\kappa$ B- $\beta$ glo-TATA-luc* (kindly provided by Falk Weih, Institute for Molecular Biotechnology, Jena, Germany) and with 0.1  $\mu\text{g}$  each of a SV40  $\beta$ -galactosidase and a *GFP* control plasmid for normalization of transfection efficiencies. Total amount of transfected DNA was 1  $\mu\text{g}$ . 48 hours later, cells were lysed, and luciferase activity

was quantified in a luminometer after addition of luciferin according to standard protocols.  $\beta$ -galactosidase activity was calculated after addition of o-nitrophenyl  $\beta$ -D-galactopyranoside (ONPG) to an aliquot of the cell lysate and incubation for 30 min. at 37°C. Absorbance was then measured at 420 nm using a spectrophotometer (plate reader). In an additional experiment, TNF $\alpha$  (20 ng/ml) was added 24 hours before cell harvesting. TNF $\alpha$  treatment induces NF- $\kappa$ B activity, and overexpression of HMGB1 enhances both constitutive and TNF $\alpha$ -induced NF- $\kappa$ B activity significantly.

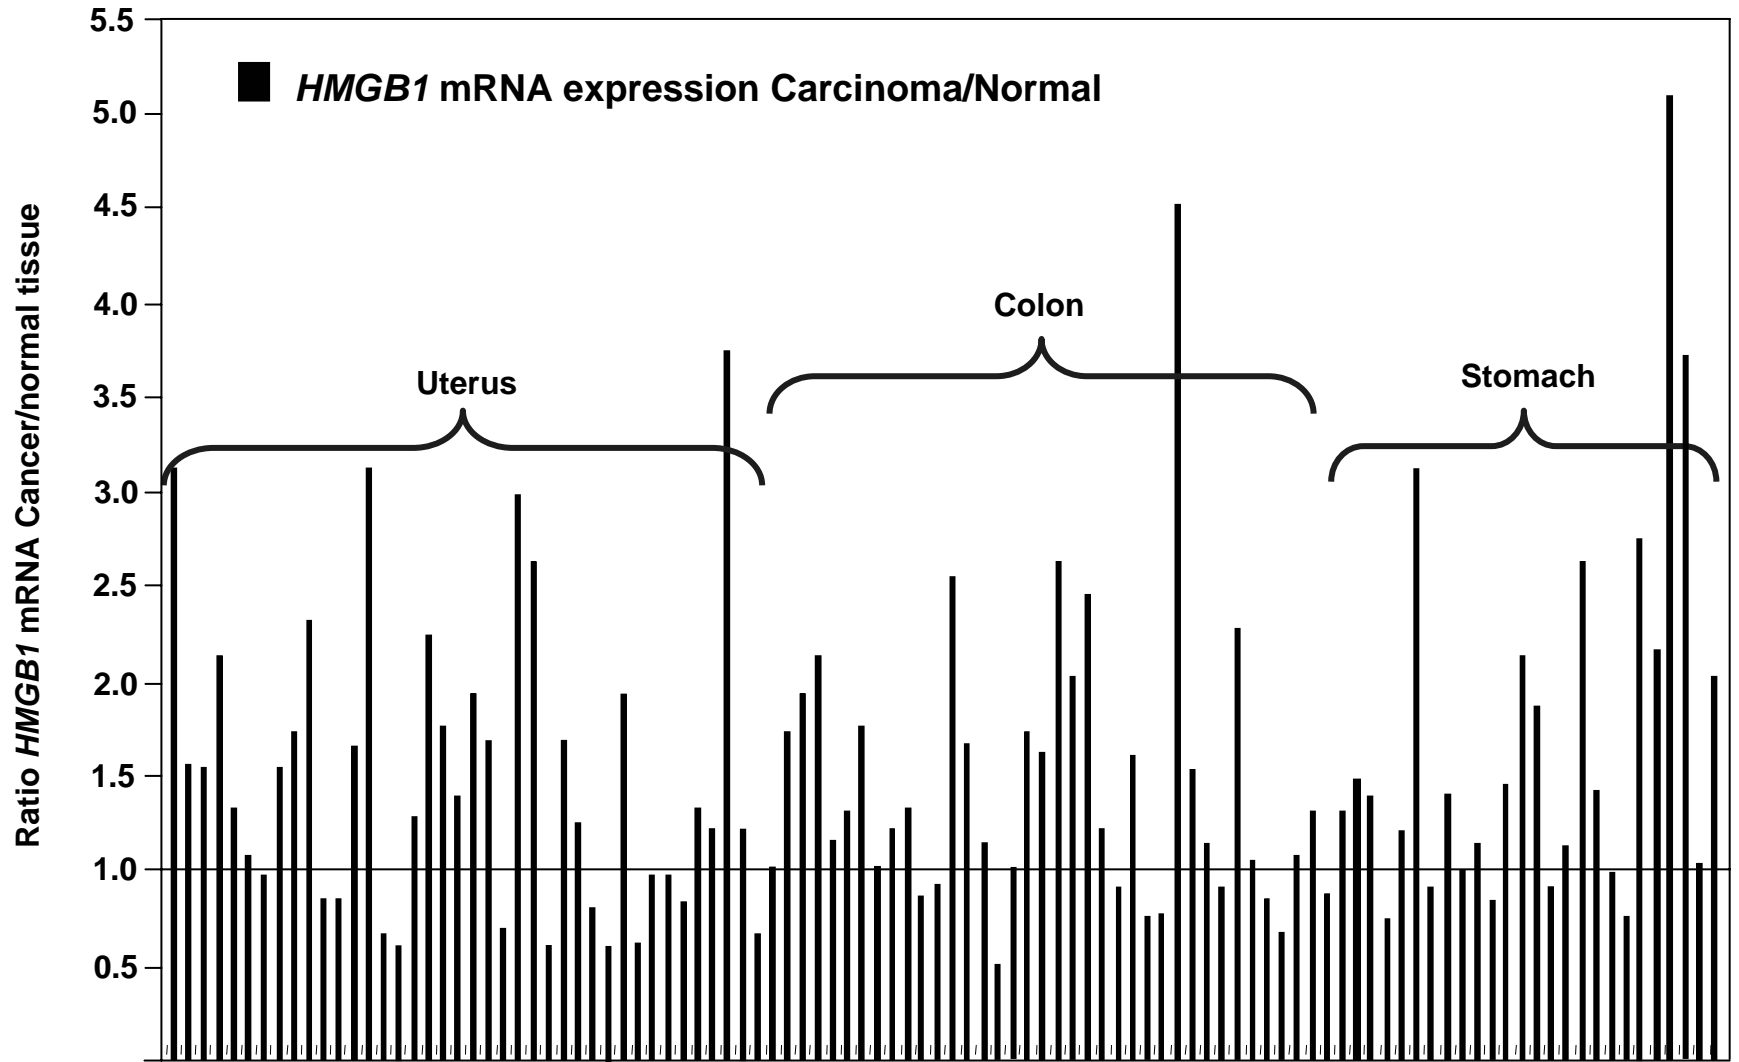

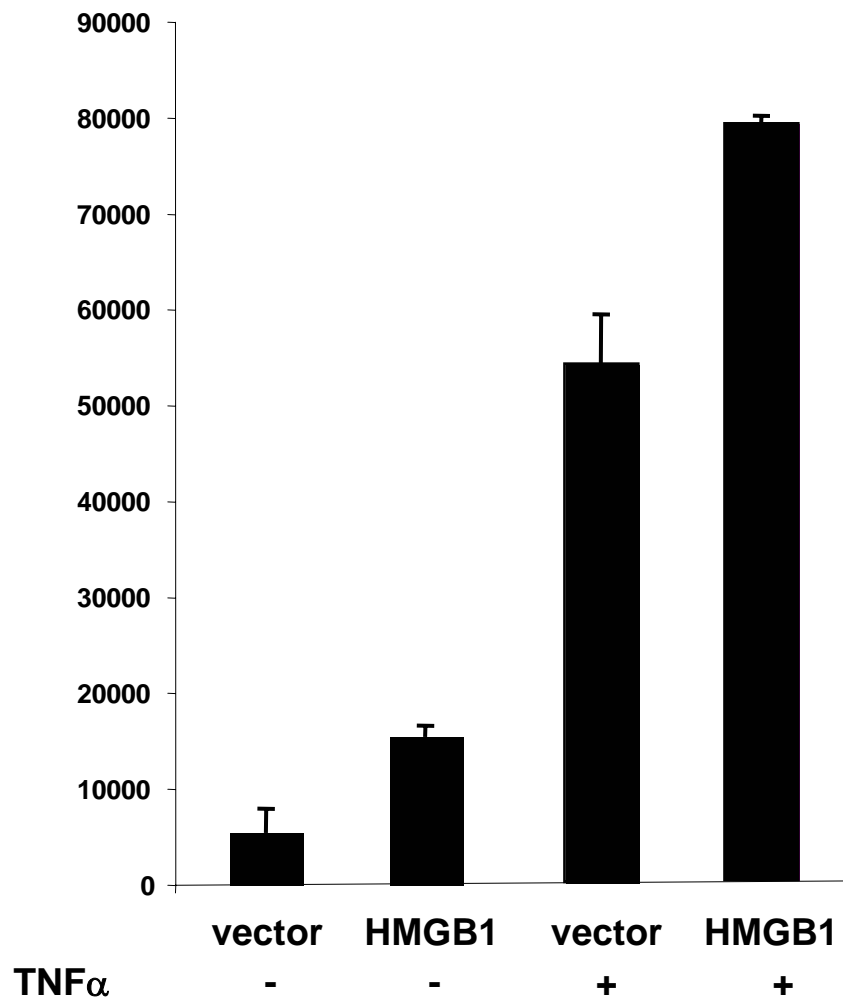

Supplement: gut_2004.062729_1.pdf [file gut_2004.062729_1.pdf]
